# Supplementary material
Source: HighWire-hosted journal article supplement (https://cmaj.ca/highwire/filestream/68209/field_highwire_adjunct_files/0/170547-image-1-at.pdf)
Supplement: 170547-image-1-at.pdf [file 170547-image-1-at.pdf]

## Appendix 1 (as supplied by the authors): Chest radiograph

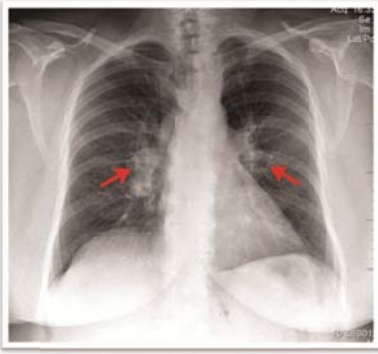

Radiograph of the patient's chest showing bilateral adenopathy of the hilar lymph nodes without interstitial markings.
